# Supplementary material
Source: HighWire-hosted journal article supplement (https://bmjopenquality.bmj.com/highwire/filestream/136033/field_highwire_adjunct_files/1/ds1879.xls)
Supplement: ds1879.xls [file ds1879.xls]

## Sheet: Sheet1
Dates	W1		W2
	Total Number of Bleeps	Bleeps for Routine Work	Total Number of Bleeps	Bleeps for Routine Work		Bleeps for Routine Work - both wards
2nd-3rd Feb	9	5	6	0		5
9th-10th Feb	10	5	6	1		6
16th-17th Feb	7	1	8	0		1
22nd – 24th Feb	6	3	4	1		4
1st – 3rd March	9	5	8	5		10
8-10th March	5	1	4	2		3
16-17th March	5	1	6	1		2
23-24th March	11	0	5	1		1
30-31st March	6	0	5	0		0
Date	Combined number bleeps for routine work	W1 - bleeps for routine work	W2 - Bleeps for routine work
2nd-3rd Feb	5	5	0
9-10th Feb	6	5	1
16-17th Feb	1	1	0
23rd-24th Feb	4	3	1
2nd-3rd March	10	5	5
9th-10th March	3	1	2
16-17th March	2	1	1
23-24th March	1	0	1
30-31st March	0	0	0
Date	Combined total bleep reuests	W1 - number of bleeps	W2 - number of bleeps
2nd-3rd Feb	15	9	6
9-10th Feb	16	10	6
16-17th Feb	15	7	8
23rd-24th Feb	10	6	4
2nd-3rd March	17	9	8
9th-10th March	9	5	4
16-17th March	11	5	6
23-24th March	16	11	5
30-31st March	11	6	5
